# Supplementary material for: Ultrathin Ba0.75Sr0.25TiO3 nanosheets with highly exposed {001} polar facets for high-performance piezocatalytic application
Source: Royal Society of Chemistry journal article supplement (doi:10.1039/d4nr02203c), 2024-01-01
Supplement: d4nr02203c1.pdf [file d4nr02203c1.pdf]

## Supporting Information

### Ultrathin $\text{Ba}_{0.75}\text{Sr}_{0.25}\text{TiO}_3$ nanosheets with highly exposed $\{001\}$ polar facets for high-performance piezocatalytic application

*Kanghui Ke, Jiang Wu\*, Zihan Kang, Enzhu Lin, Ni Qin\*, Dinghua Bao*

State Key Laboratory of Optoelectronic Materials and Technologies, School of Materials Science and Engineering, Sun Yat-Sen University, Guangzhou 510275, China

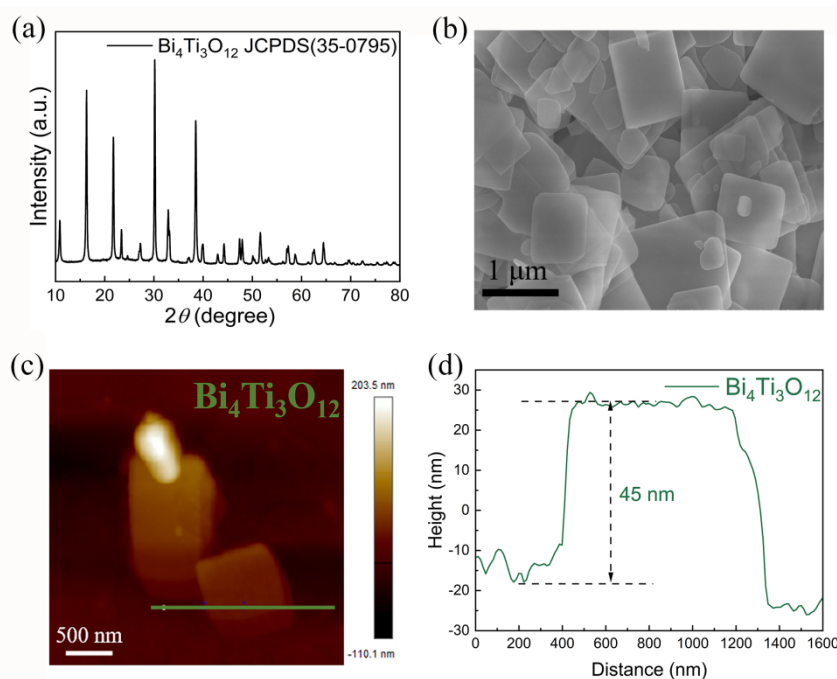

**Fig. S1.** (a) XRD pattern, (b) SEM image, and (c) AFM image of the  $\text{Bi}_4\text{Ti}_3\text{O}_{12}$  nanoplates as synthesized by molten salt method. (d) Height profile of a single  $\text{Bi}_4\text{Ti}_3\text{O}_{12}$  nanoplate along the green line in the AFM image.

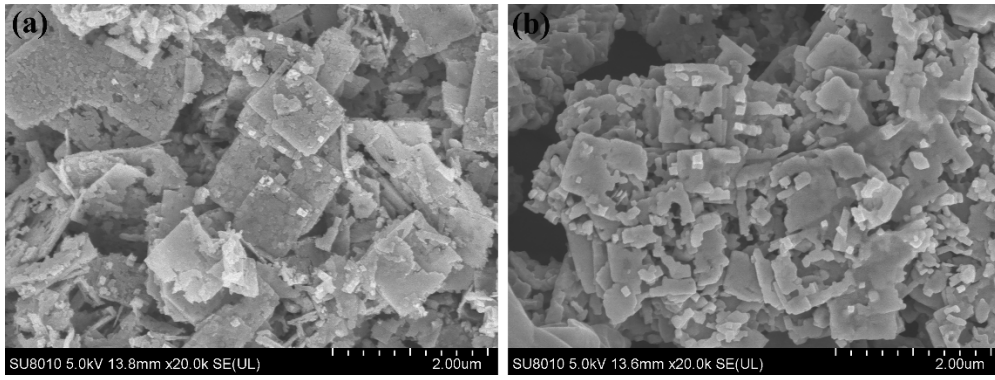

Fig. S2. SEM images of the synthesized (a)  $\text{Ba}_{0.85}\text{Sr}_{0.15}\text{TiO}_3$  and (b)  $\text{Ba}_{0.7}\text{Sr}_{0.3}\text{TiO}_3$ .

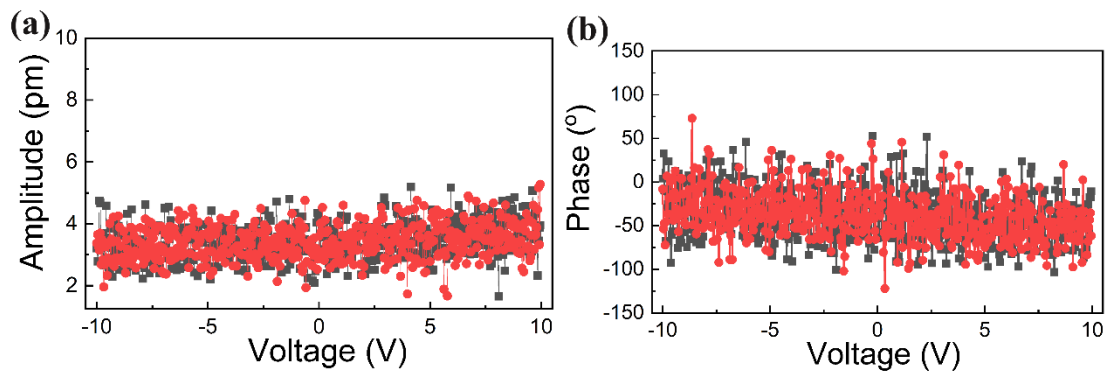

Fig. S3. In-plane (a) amplitude butterfly loop and (b) phase hysteresis loop of the prepared  $\text{Ba}_{0.75}\text{Sr}_{0.25}\text{TiO}_3$ .

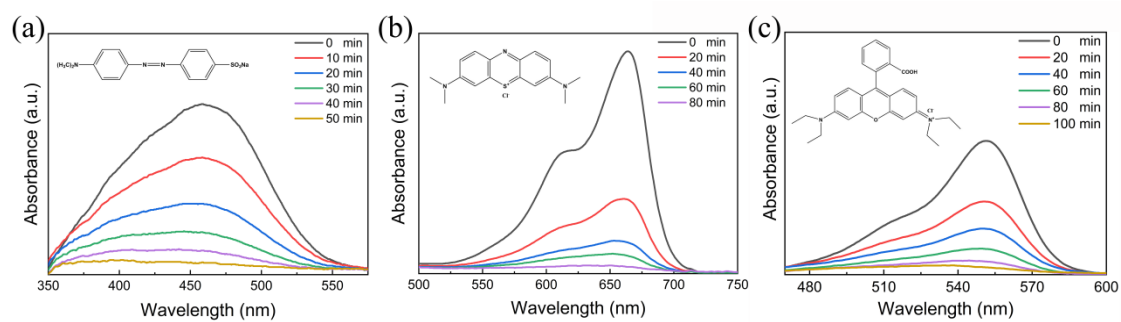

**Fig. S4.** Evolution of UV-vis absorption spectra of (a) MO, (b) MB and (c) RhB solutions during the piezocatalytic degradation using  $\text{Ba}_{0.75}\text{Sr}_{0.25}\text{TiO}_3$  nanosheets as piezocatalyst.

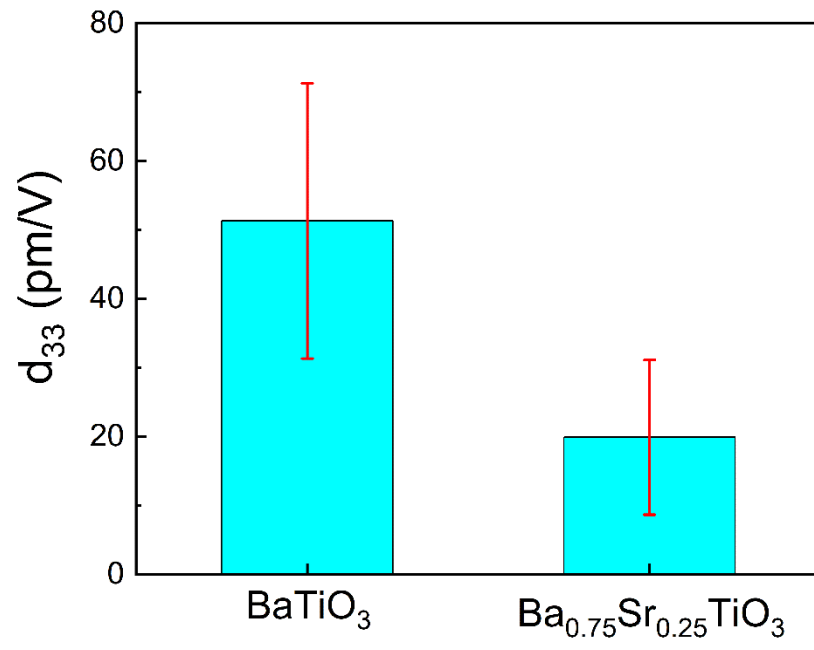

Fig. S5.  $d_{33}$  of the synthesized  $\text{BaTiO}_3$  and  $\text{Ba}_{0.75}\text{Sr}_{0.25}\text{TiO}_3$ .

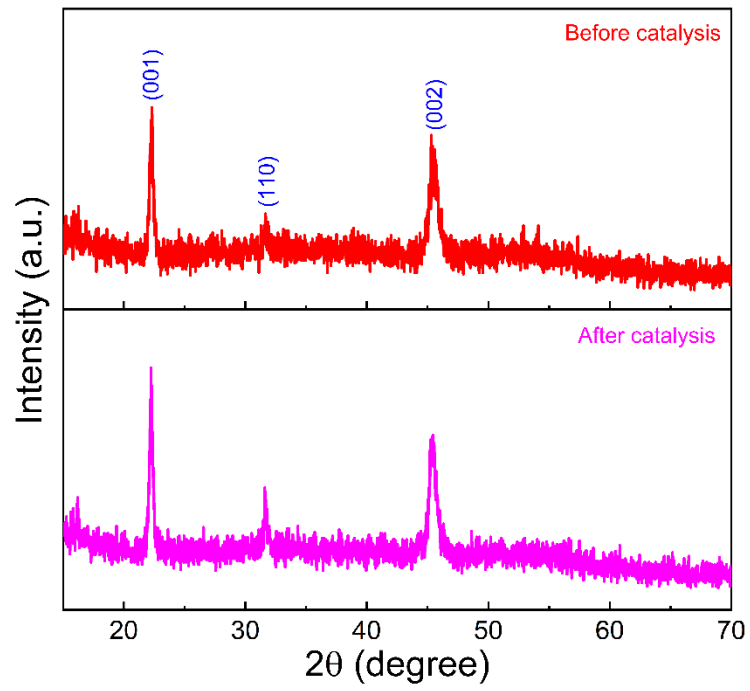

Fig. S6. XRD patterns of the  $\text{Ba}_{0.75}\text{Sr}_{0.25}\text{TiO}_3$  before and after cyclic test.

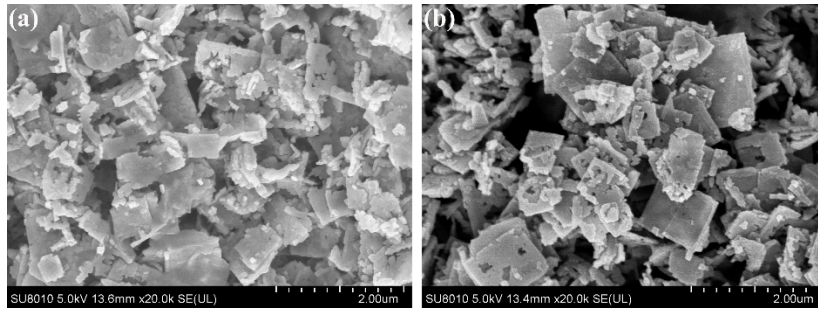

Fig. S7. SEM images of the (a) pristine and (b) recycled  $\text{Ba}_{0.75}\text{Sr}_{0.25}\text{TiO}_3$ .

## DFT Calculation

The spin-polarized density functional theory (DFT) calculations were conducted by using the projected augmented wave (PAW) pseudopotentials [1], as implemented in the Vienna ab-initio Simulation Package (VASP) [2,3]. The exchange correlation function of Perdew-Burke-Ernzerhof (PBE) form was employed [4], with a plane wave basis cut-off energy set to 450 eV. The convergence criteria were set to be  $10^{-4}$  in energy and 0.02 eV/Å in force. The BaTiO<sub>3</sub> and Ba<sub>0.75</sub>Sr<sub>0.25</sub>TiO<sub>3</sub> with the BaO-terminated (001) surface was modelled by a seven-layer slab, where the atoms in the bottom three layers were fixed at the theoretical bulk lattice positions. The Brillouin zone was sampled by a Monkhorst–Pack k-point mesh of 4×4×1 grid and a vacuum layer of 15 Å was employed to avoid interactions of neighboring images. The van der Waals (vdW) interactions between BaTiO<sub>3</sub> and reactants were treated using the Grimme’s D3-type of the semiempirical method [5].

Adsorption energies ( $E_{\text{ads}}$ ) were calculated by using the following equation.

$$E_{\text{ads}} = E_{\text{total}} - E_{\text{substrate}} - E_{\text{reactant}}$$

where  $E_{\text{total}}$  is the total energy of adsorbed systems,  $E_{\text{substrate}}$  and  $E_{\text{reactant}}$  are the energies of the substrate BaTiO<sub>3</sub>/Ba<sub>0.75</sub>Sr<sub>0.25</sub>TiO<sub>3</sub> and reactants, respectively. According to the definition, a negative  $E_{\text{ads}}$  indicates an energetically stable configuration.

## References

1. P. E. Blöchl, Phys. Rev. B 50, (1994) 17953-17979.
2. G. Kresse, J. Furthmüller, Phys. Rev. B 54 (1996) 11169-11186.
3. G. Kresse, J. Hafner, Phys. Rev. B 49 (1994) 14251-14269.
4. J. P. Perdew, K. Burke, M. Ernzerhof, Phys. Rev. Lett. 77 (1996) 3865-3868.
5. S. Grimme, J. Antony, S. Ehrlich, H. Krieg, J. Chem. Phys. 132 (2010) 154104.
